# Supplementary material for: Global Analysis of the Fungal Microbiome in Cystic Fibrosis Patients Reveals Loss of Function of the Transcriptional Repressor Nrg1 as a Mechanism of Pathogen Adaptation
Source: PLoS Pathog. 2015 Nov 20;11(11):e1005308. doi: 10.1371/journal.ppat.1005308 (PMC4654494; doi:10.1371/journal.ppat.1005308)
Supplement: S1 Table — (XLSX) [file ppat.1005308.s016.xlsx]

## Sheet: Sheet1
Patient	Sampling points (Months)	ITS1 amplification	BMI	FEV1 (L)	FEV1 %pred.	ABPA diagnosis	Pseudomonas (non-mucoid)	Pseudomonas (mucoid)	Clinical State	Lung disease stage	Triazole prescription
CF006	0	Y	17.14	1.5	46	N	Moderate	Heavy	T	Intermediate	N
	6	Y	18.18	1.82	56	N	Moderate	Moderate	T	intermediate	N
	9	Y	16.92	1.74	54	N	Heavy	Heavy	T	intermediate	N
	10	N	17.66	1.66	51	N	Moderate	Moderate	T	intermediate	N
CF011	0	Y	24.03	2.64	56	N	Light		E	intermediate	N
	4	Y	24.49	2.58	55	N			T	intermediate	N
	6	Y	25.44	2.64	56	N	Light		U	intermediate	N
CF014	0	Y	NA	NA	NA	N			T	unknown	N
	2	Y	24.31	1.81	44	N			R	intermediate	Y
CF020	0	Y	20.37	NA	NA	Previous diagnosis		Heavy	E	unknown	N
CF025	0	Y	24.07	3.61	76	N			T	early	N
	4	N	24.42	3.83	81	ABPA			B	early	Y
	9	Y	23.24	3.81	81	N			B	early	Y
	13	Y	23.3	3.6	76	ABPA			O	early	N
	20	Y	22.76	3.96	85	N			O	early	Y
CF027	0	Y	20.45	2.3	63	Previous diagnosis	moderate	moderate	B	intermediate	N
	3	Y	20.07	2.29	62	N	Moderate	Moderate	R	intermediate	N
	5	N	18.86	2.19	60	N	Heavy	Heavy	B	intermediate	N
	7	N	20.07	2.25	62	N	Moderate	Heavy	B	intermediate	N
	8	Y	19.79	1.67	46	N	Moderate	Heavy	T	intermediate	N
	9	Y	20.14	1.51	41	N	Light	Light	T	intermediate	N
	10	Y	19.65	2.04	56	ABPA	Heavy	Heavy	O	intermediate	N
	11	Y	19.69	1.89	52	N	Moderate	Heavy	O	intermediate	N
CF028	0	Y	23.98	2.31	56	N		Moderate	O	intermediate	N
	8	Y	27.92	2.08	51	N		Heavy	T	intermediate	N
	9	Y	NA	NA	NA	N		Heavy	T	unknown	N
	9	Y	27.51	2.26	56	N		Heavy	T	intermediate	N
	10	Y	27.51	2.14	53	N		Heavy	T	intermediate	N
	10	Y	NA	NA	NA	N		Heavy	T	unknown	N
	12	Y	27.48	2.36	58	N		Moderate	T	intermediate	N
	15	Y	23.05	2.02	50	N		Heavy	T	intermediate	Y
	18	Y	NA	NA	NA	N			U	unknown	N
CF030	0	Y	22.31	1.9	45	N			T	intermediate	N
	1	Y	22.47	1.99	48	N	Light		T	intermediate	N
	6	Y	22.28	2.01	48	N	Light		T	intermediate	N
CF033	0	Y	24.08	1.93	44	N		Moderate	T	intermediate	N
	1	Y	NA	NA	NA	N	Moderate		T	unknown	N
	1	Y	23.72	2.03	47	N	Moderate		T	intermediate	N
	4	Y	25.17	1.62	38	N		Moderate	T	advanced	N
	5	Y	24.57	1.87	43	N		Moderate	U	intermediate	N
	5	N	24.67	1.86	43	N	Heavy	Heavy	T	intermediate	N
	7	N	24.77	1.93	45	N		Heavy	T	intermediate	N
	8	Y	24.54	1.55	36	N	Moderate	Moderate	T	advanced	N
	10	N	24.11	1.54	36	N		Moderate	T	advanced	N
	13	Y	23.81	1.65	38	N	Heavy	Heavy	T	advanced	N
CF036	0	Y	28.47	1.09	25	N		Light	T	advanced	N
CF037	0	Y	19.85	1.27	36	N	Moderate		T	advanced	N
	4	N	NA	NA	NA	N			U	unknown	N
	5	Y	20.69	1.18	33	N	Moderate		T	advanced	N
CF039	0	Y	19.59	2	66	N			E	intermediate	N
CF058	0	Y	NA	NA	NA	N			B	unknown	N
CF060	0	Y	21.79	1.93	46	ABPA		Moderate	O	intermediate	Y
	2	Y	24.02	2.07	49	N	Moderate	Moderate	B	intermediate	Y
	18	Y	20.55	2.38	57	N		Light	B	intermediate	Y
CF061	0	N	25.65	1.76	52	N		Light	S	intermediate	N
CF063	0	Y	22.41	1.24	40	N			T	intermediate	N
	0	Y	22.55	1.32	42	N			R	intermediate	N
	4	Y	23.29	1.15	37	N			B-F	advanced	N
	5	Y	22.77	1.13	36	N			T	advanced	N
CF066	0	N	24.95	1.72	38	N	Moderate	Moderate	E	advanced	N
	20	N	24.98	1.77	40	N	Heavy		T	intermediate	N
	22	N	25.86	2.04	46	N	Heavy	Heavy	E	intermediate	N
	22	N	26.13	2.25	50	N	Heavy		B-F	intermediate	N
	23	N	25.76	2.1	47	N	Moderate	Light	T	intermediate	N
	25	N	26.03	2.12	47	N	Moderate		T	intermediate	N
	28	N	26.97	2.13	48	N	Heavy	Light	B	intermediate	N
	31	N	27.04	1.92	43	N	Heavy	Light	T	intermediate	N
	31	N	26.7	1.88	42	N	Moderate	Moderate	T	intermediate	N
	31	N	26.7	1.89	43	N	Heavy		T	intermediate	N
CF071	0	Y	19.28	0.93	28	N	Moderate		T	advanced	N
	1	Y	19.83	0.95	29	N	Moderate		O	advanced	N
	9	Y	18.88	0.94	29	N	Moderate		O	advanced	N
CF098	0	Y	17.5	1.9	58	ABPA			O	intermediate	Y
	0	Y	17.5	2.03	64	ABPA			O	intermediate	Y
	18	Y	21.11	1.44	44	N	Light		O	intermediate	N
	20	Y	21.42	1.68	52	N	heavy		O	intermediate	N
CF107	0	Y	24.06	1.74	55	ABPA			O	intermediate	Y
	5	Y	NA	NA	NA	N	Moderate		T	unknown	Y
	7	Y	25.51	2.61	71	N	Moderate		R	early	Y
	10	Y	25.43	2.5	68	N	Light	Light	B	intermediate	Y
	11	N	25.62	2.35	64	N	Heavy	Moderate	B	intermediate	Y
	16	Y	NA	NA	NA	N	heavy		T	unknown	Y
CF117	0	Y	28.43	1.22	31	N	Light	Light	B-F	advanced	N
	2	Y	28.54	1.19	30	N	Moderate	Heavy	E	advanced	N
	5	N	28.19	1.48	37	N	Light	Light	B	advanced	N
	7	Y	27.48	1.61	40	N	Light	Light	T	intermediate	N
CF133	0	Y	21.77	3.02	81	N	Heavy	Light	B-F	early	N
CF143	0	Y	20.61	1.98	60	N			T	intermediate	N
CF162	0	Y	28.52	1.63	44	N			B	intermediate	N
CF170	0	Y	NA	NA	NA	N			T	unknown	N
	0	Y	NA	NA	NA	N			T	unknown	N
	1	N	NA	NA	NA	N			T	unknown	N
	2	Y	NA	NA	NA	N			T	unknown	N
	2	Y	NA	NA	NA	N			T	unknown	N
	2	Y	NA	NA	NA	N			T	unknown	N
	3	Y	NA	NA	NA	N			T	unknown	N
	3	Y	NA	NA	NA	N			T	unknown	N
	4	Y	NA	NA	NA	N			T	unknown	N
CF198	0	Y	27.56	2.07	42	N	Moderate	Heavy	E	intermediate	N
	1	Y	NA	NA	NA	N	Moderate	Heavy	T	unknown	N
	1	Y	NA	NA	NA	N	Moderate	Heavy	T	unknown	N
	6	Y	26.96	2.01	41	N		Heavy	E	intermediate	N
CF202	0	Y	22.47	1.86	44	N	Moderate	Moderate	E	intermediate	N
	1	Y	22.73	1.76	42	N			R	intermediate	N
	3	Y	NA	NA	NA	N	Heavy	Heavy	T	unknown	N
	4	Y	NA	NA	NA	N	Heavy	Heavy	T	unknown	N
	4	Y	NA	NA	NA	N	Heavy	Heavy	T	unknown	N
	5	Y	24.02	1.56	38	N	Moderate	Moderate	T	advanced	N
	6	Y	23.82	1.94	47	N	Moderate	Light	R	intermediate	N
CF206	0	Y	20.53	2.21	64	N		Heavy	B-F	intermediate	N
	5	Y	21.52	2.18	63	N	Moderate	Moderate	R	intermediate	N
CAlb1_S36	NA	Y	NA	NA	NA	NA	NA	NA	NA	NA	NA
