# Supplementary material for: Global Analysis of the Fungal Microbiome in Cystic Fibrosis Patients Reveals Loss of Function of the Transcriptional Repressor Nrg1 as a Mechanism of Pathogen Adaptation
Source: PLoS Pathog. 2015 Nov 20;11(11):e1005308. doi: 10.1371/journal.ppat.1005308 (PMC4654494; doi:10.1371/journal.ppat.1005308)
Supplement: S2 Table — (XLSX) [file ppat.1005308.s017.xlsx]

## Sheet: Sheet1
contig	position	context.x	ref_allele.x	alt_allele.x	Loci	Mutation	t_lod_fstar.x	init_n_lod.x	judgement.x
Ca21chr1_C_albicans_SC5314	1475168	CAAxTTG	C	T	N/A	Intergenic	32.1168	7.35745	KEEP
Ca21chr1_C_albicans_SC5314	1475186	CTCxCAT	G	T	N/A	Intergenic	40.1556	7.75393	KEEP
Ca21chr1_C_albicans_SC5314	1481378	TGTxCAA	A	G	ATC1	Y558H (non-polar->+charged)	111.146	17.4487	KEEP
Ca21chr1_C_albicans_SC5314	572448	CTGxTGC	C	G	NA	Intergenic	55.6539	11.4323	KEEP
Ca21chr1_C_albicans_SC5314	572514	ACAxTTC	T	G	NA	Intergenic	42.5932	11.1297	KEEP
Ca21chr1_C_albicans_SC5314	83129	TAAxGAA	C	T	orf19.6055	synonymous	40.8825	10.2319	KEEP
Ca21chr1_C_albicans_SC5314	83156	AAAxGAA	T	C	orf19.6055	synonymous	12.5786	11.1311	KEEP
Ca21chr1_C_albicans_SC5314	83162	ATTxGAA	G	A	orf19.6055	synonymous	18.0022	11.4283	KEEP
Ca21chr2_C_albicans_SC5314	1196971	CGGxGGT	T	C	orf19.5205	synonymous	24.738	9.02687	KEEP
Ca21chr2_C_albicans_SC5314	1216213	TAAxCCT	C	T	orf19.5216	V267I (non-polar->non-polar)	34.3426	10.5269	KEEP
Ca21chr2_C_albicans_SC5314	166083	TGCxAAA	C	A	HGT7	synonymous	44.4754	3.60617	KEEP
Ca21chr2_C_albicans_SC5314	166342	GCTxCTG	C	T	N/A	Intergenic	51.2541	5.11706	KEEP
Ca21chr2_C_albicans_SC5314	167089	AGGxAAT	C	T	N/A	Intergenic	7.88011	4.2141	KEEP
Ca21chr2_C_albicans_SC5314	167097	TCTxGAT	C	G	N/A	Intergenic	20.2065	4.51481	KEEP
Ca21chr2_C_albicans_SC5314	167155	GTTxAGA	T	C	N/A	Intergenic	16.839	3.61208	KEEP
Ca21chr2_C_albicans_SC5314	167238	TTAxTTT	A	T	N/A	Intergenic	71.9497	3.91018	KEEP
Ca21chr2_C_albicans_SC5314	167500	TACxATT	C	A	HGT8	synonymous	55.5502	2.40802	KEEP
Ca21chr2_C_albicans_SC5314	167893	TATxTTC	C	T	HGT8	synonymous	26.2263	7.82603	KEEP
Ca21chr2_C_albicans_SC5314	2196953	GCAxTAG	A	G	orf19.5345	N249I (polar->non-polar)	8.30092	10.2087	KEEP
Ca21chr2_C_albicans_SC5314	403673	ACTxTGT	T	C	FMO1	K151E (+->-)	23.7627	10.2305	KEEP
Ca21chr3_C_albicans_SC5314	1709056	TTGxTTT	T	C	N/A	Intergenic	43.9212	4.81608	KEEP
Ca21chr3_C_albicans_SC5314	1709183	TTTxTTT	A	G	N/A	Intergenic	17.794	4.8146	KEEP
Ca21chr3_C_albicans_SC5314	18623	GTGxTAT	G	C	SEC6	T304S (polar->polar)	112.754	17.1391	KEEP
Ca21chr3_C_albicans_SC5314	18732	GGGxCCG	T	C	SEC6	T268A (polar->non-polar)	102.763	16.856	KEEP
Ca21chr4_C_albicans_SC5314	1047774	ACTxAAT	T	C	N/A	Intergenic	51.3425	7.22423	KEEP
Ca21chr4_C_albicans_SC5314	1172093	ATGxTTC	C	A	PUF3	A316D (non-polar->-charged)	33.9755	8.72558	KEEP
Ca21chr4_C_albicans_SC5314	822404	AATxGTA	G	A	orf19.5043	G56S (G->polar)	7.5501	3.0101	KEEP
Ca21chr4_C_albicans_SC5314	838208	ACCxATA	A	G	PYC2	synonymous	50.4826	6.61845	KEEP
Ca21chr5_C_albicans_SC5314	525828	AGTxATA	A	G	orf19.4245	synonymous	47.4586	7.525	KEEP
Ca21chr5_C_albicans_SC5314	525853	TATxTTG	T	C	orf19.4245	K402R (+charged->+charged)	34.5139	6.31831	KEEP
Ca21chr5_C_albicans_SC5314	525935	GTTxTTG	G	T	orf19.4245	Q375K (polar->+charged)	13.877	7.22412	KEEP
Ca21chr5_C_albicans_SC5314	525936	TTGxTGT	T	C	orf19.4245	synonymous	13.277	7.52501	KEEP
Ca21chr5_C_albicans_SC5314	526047	TTTxTTC	T	C	orf19.4245	synonymous	29.9003	4.51508	KEEP
Ca21chr5_C_albicans_SC5314	526059	TACxGTC	T	G	orf19.4245	synonymous	29.5121	6.01626	KEEP
Ca21chr5_C_albicans_SC5314	526401	ATGxATC	G	A	orf19.4245	synonymous	46.9475	18.6481	KEEP
Ca21chr5_C_albicans_SC5314	526577	TGTxTTG	C	A	orf19.4245	D161Y (-charged->non-polar)	15.3323	17.4324	KEEP
Ca21chr5_C_albicans_SC5314	526761	CTTxGAG	A	G	orf19.4245	synonymous	16.3519	11.1371	KEEP
Ca21chr5_C_albicans_SC5314	526800	CACxACC	C	T	orf19.4245	synonymous	36.1545	10.8322	KEEP
Ca21chr5_C_albicans_SC5314	526942	GATxTGG	C	T	orf19.4245	synonymous	59.634	11.4296	KEEP
Ca21chr5_C_albicans_SC5314	527031	AGGxCCG	T	C	orf19.4245	synonymous	41.242	5.95076	KEEP
Ca21chr5_C_albicans_SC5314	562903	CAAxTAA	C	T	N/A	Intergenic	9.72048	6.02007	KEEP
Ca21chr5_C_albicans_SC5314	826392	GGGxATT	G	A	orf19.1121	D258N (-charged->polar)	9.21182	8.42505	KEEP
Ca21chr5_C_albicans_SC5314	829677	TGCxAGT	T	C	FAV2	synonymous	15.3215	14.1425	KEEP
Ca21chr5_C_albicans_SC5314	830051	TTTxCAA	A	T	N/A	Intergenic	10.3322	6.92304	KEEP
Ca21chr5_C_albicans_SC5314	830237	ATAxTGT	G	A	N/A	Intergenic	10.0816	2.70903	KEEP
Ca21chr5_C_albicans_SC5314	830268	CTAxATG	C	T	N/A	Intergenic	13.5307	2.40802	KEEP
Ca21chr5_C_albicans_SC5314	830312	ATAxTTT	T	C	N/A	Intergenic	32.1985	4.51502	KEEP
Ca21chr5_C_albicans_SC5314	830485	GTTxCCA	A	C	N/A	Intergenic	44.3109	6.92308	KEEP
Ca21chr6_C_albicans_SC5314	1031820	AGCxCAC	C	T	N/A	Intergenic	9.09131	14.1396	KEEP
Ca21chr6_C_albicans_SC5314	24208	CACxGGG	C	T	orf19.1180	synonymous	17.8277	10.2258	KEEP
Ca21chr6_C_albicans_SC5314	919391	GGTxTGG	A	G	SEC5	I35T (non-polar->polar)	35.4327	7.82214	KEEP
Ca21chr6_C_albicans_SC5314	922997	TTAxCAT	T	C	orf19.73	S845P (polar->P)	25.5387	4.81245	KEEP
Ca21chr6_C_albicans_SC5314	988164	TACxTTC	T	C	CST5	L88P (non-polar->P)	39.0007	14.1273	KEEP
Ca21chr7_C_albicans_SC5314	574150	TTAxACG	C	T	N/A	Intergenic	14.8234	2.40808	KEEP
Ca21chr7_C_albicans_SC5314	912877	ACTxCGT	A	G	N/A	Intergenic	79.3893	16.1825	KEEP
Ca21chr7_C_albicans_SC5314	919658	CAAxATA	G	A	NRG1	D271N (-charged->polar, homozygous)	248.058	16.2518	KEEP
Ca21chrR_C_albicans_SC5314	1195356	AATxTAT	A	G	N/A	Intergenic	14.5856	3.91286	KEEP
Ca21chrR_C_albicans_SC5314	1522408	TTTxTGT	T	A	N/A	Intergenic	17.2669	4.81245	KEEP
Ca21chrR_C_albicans_SC5314	1913334	TTCxTTC	T	C	orf19.7290	synonymous (homozygous)	143.982	7.8196	KEEP
Ca21chrR_C_albicans_SC5314	2033856	GTAxTTG	C	T	orf19.6608	V269I (non-polar->non-polar, homozygous)	90.5704	9.32738	KEEP
Ca21chrR_C_albicans_SC5314	2036397	TCAxTAT	C	T	orf19.6607	S17N (polar->polar, homozygous)	67.122	11.7366	KEEP
Ca21chrR_C_albicans_SC5314	2049005	AAAxAAA	A	T	N/A	Intergenic (homozygous)	36.2927	2.40203	KEEP
Ca21chrR_C_albicans_SC5314	729724	TGTxAGG	C	T	N/A	Intergenic	19.487	3.30879	KEEP
Ca21chrR_C_albicans_SC5314	729730	GCTxTTC	G	C	N/A	Intergenic	22.7745	3.61193	KEEP
Ca21chrR_C_albicans_SC5314	729922	GAAxTAT	A	G	N/A	Intergenic	17.575	5.11678	KEEP
Ca21chrR_C_albicans_SC5314	730049	GACxCCA	A	G	N/A	Intergenic	24.6399	6.61971	KEEP
Ca21chrR_C_albicans_SC5314	730225	ATTxAAC	T	C	N/A	Intergenic	14.6233	12.3355	KEEP
Ca21chrR_C_albicans_SC5314	730268	GAGxGGA	A	G	N/A	Intergenic	38.7421	14.1282	KEEP
Ca21chrR_C_albicans_SC5314	730350	CATxTAT	T	G	N/A	Intergenic	75.4875	14.1419	KEEP
Ca21chrR_C_albicans_SC5314	730413	GTTxAAT	T	C	N/A	Intergenic	84.3682	14.4429	KEEP
Ca21chrR_C_albicans_SC5314	730680	TTTxATT	T	G	N/A	Intergenic	21.0799	10.8363	KEEP
Ca21chrR_C_albicans_SC5314	730718	ATCxTCA	T	C	N/A	Intergenic	19.2496	11.7346	KEEP
Ca21chrR_C_albicans_SC5314	730720	CTTxAGA	C	T	N/A	Intergenic	22.74	11.7391	KEEP
Ca21chrR_C_albicans_SC5314	730902	TGTxCTG	G	A	N/A	Intergenic	41.7386	12.6336	KEEP
Ca21chrR_C_albicans_SC5314	837853	AAAxTTC	T	G	PRP42	K62N (+->polar)	38.6006	9.62854	KEEP
Ca21chrR_C_albicans_SC5314	999913	TGGxCCT	G	A	PRE6	Intron	47.6135	11.7345	KEEP
